# Supplementary material
Source: Springer Nature journal article supplement (https://www.springermedizin.de/resource/supplementary/13023_2013_604_MOESM3_ESM.pdf/9642498)
Supplement: MOESM3 [file 9642498]

**A**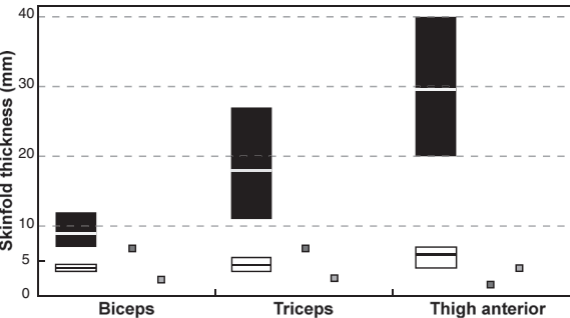**B**

|                      | Percentage of fat (DEXA) |          |             |             |
|----------------------|--------------------------|----------|-------------|-------------|
|                      | Total                    | Trunk    | Upper limbs | Lower limbs |
| <b>Patient 1</b>     | 40.0                     | 46.7     | 39.3        | 27.5        |
| <b>Patient 2</b>     | 24.7                     | 30.9     | 24.3        | 14          |
| <b>Normal values</b> | 30.3 ± 1.5               | 29 ± 1.6 | 30.2 ± 1.8  | 33.1 ± 1.5  |
